# Supplementary material
Source: HighWire-hosted journal article supplement (https://bmjopen.bmj.com/content/10/11/e041774)

### CPP by age group

Crude rate of children becoming subject to a CPP, per 100,000

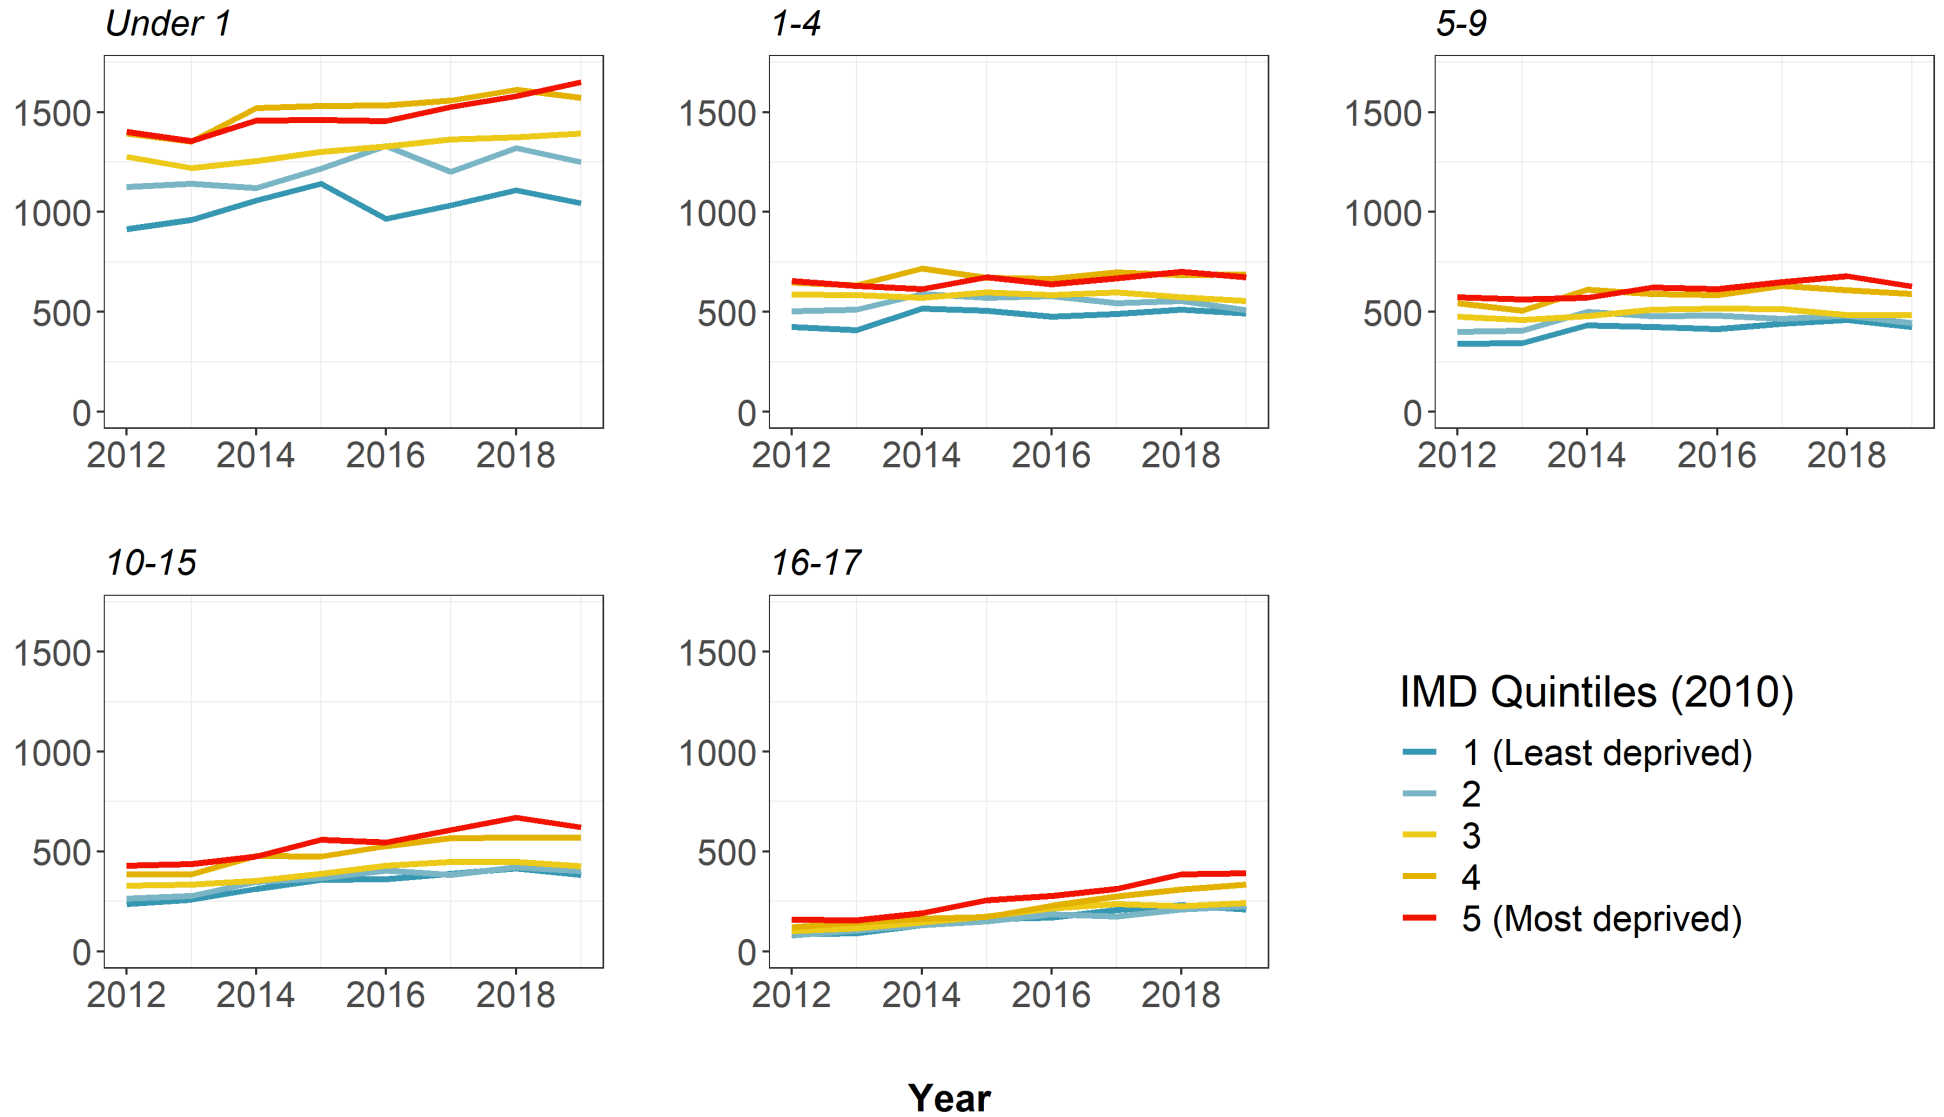

Supplement: inline-supplementary-material-3 [file inline-supplementary-material-3.pdf]
