# Supplementary material
Source: HighWire-hosted journal article supplement (https://bmjopen.bmj.com/content/10/11/e041774)

### CIN by age group

Crude rate of children beginning an episode of need, per 100,000

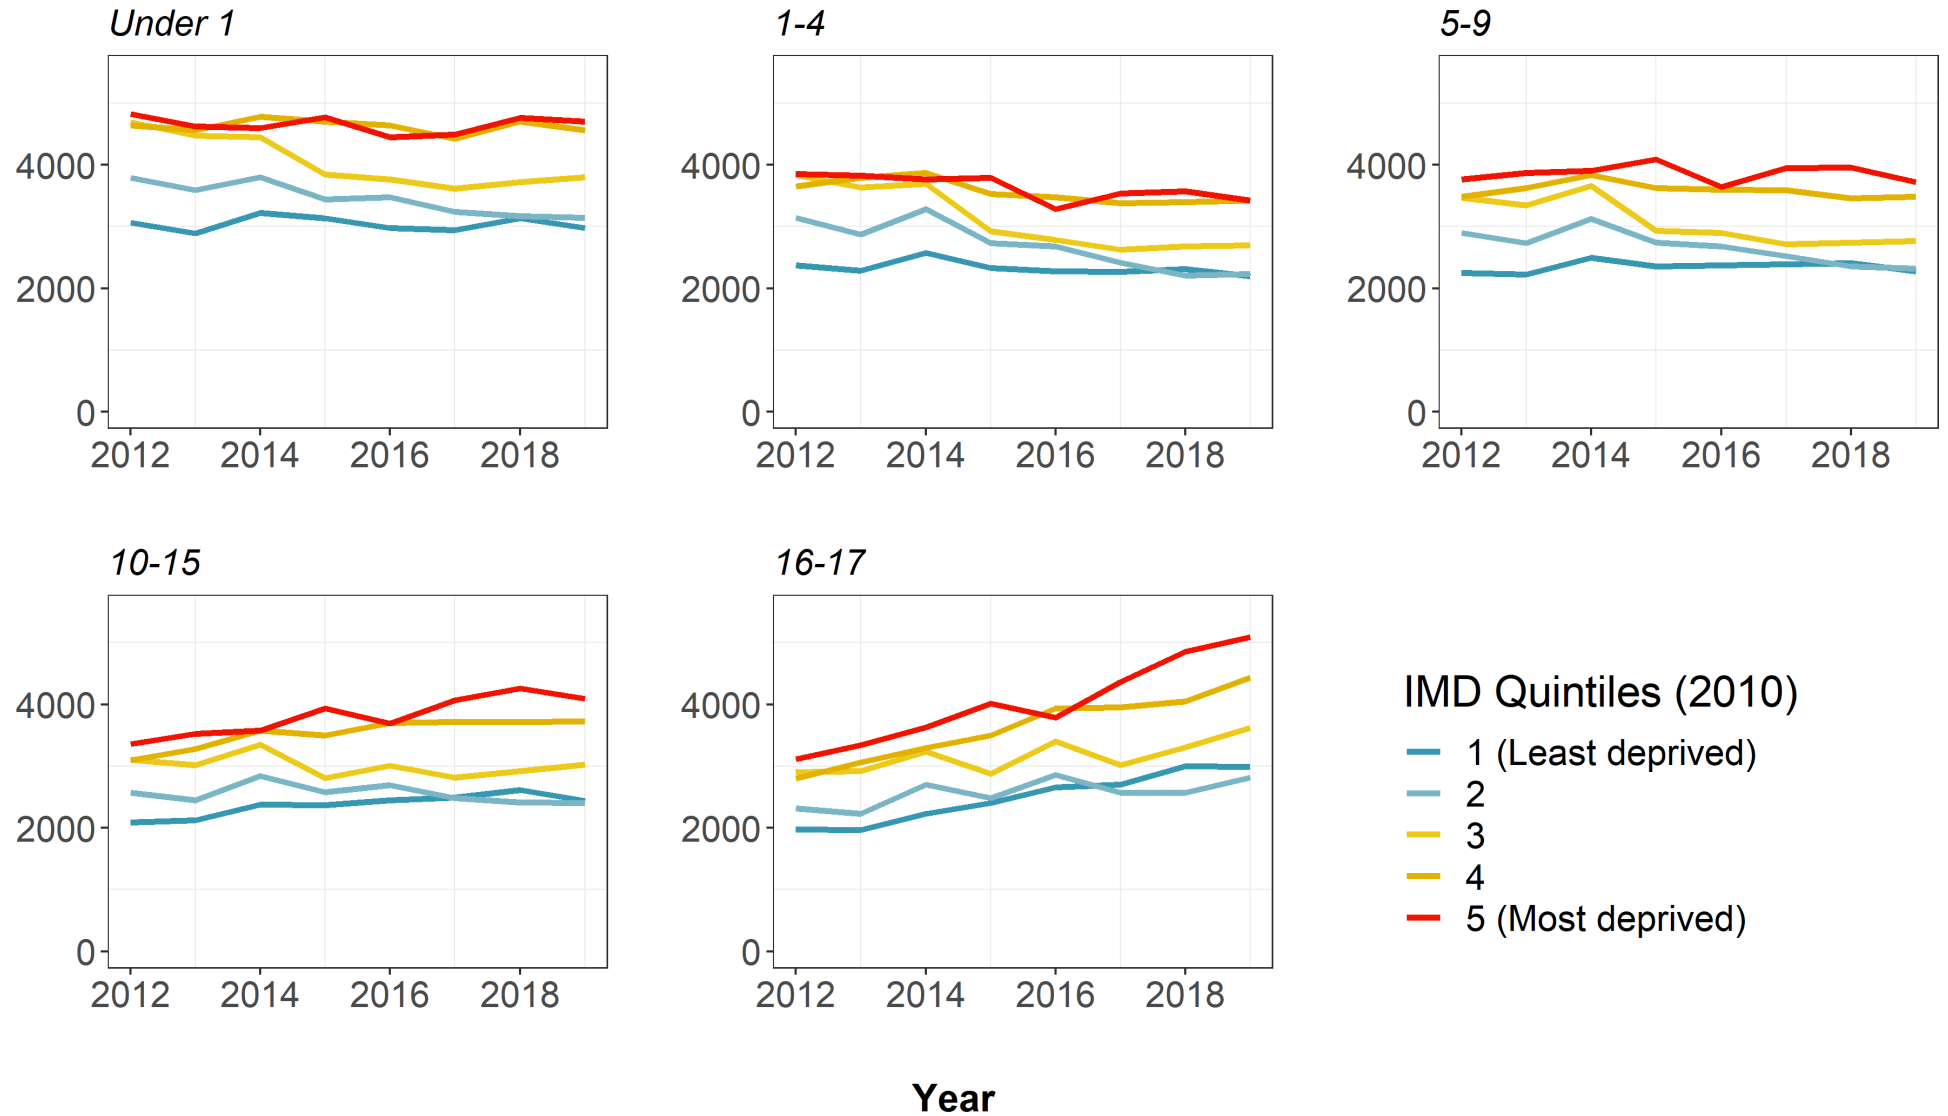

Supplement: inline-supplementary-material-5 [file inline-supplementary-material-5.pdf]
