# Supplementary material
Source: HighWire-hosted journal article supplement (https://bmjopen.bmj.com/content/10/11/e041774)

### CPP by category of abuse

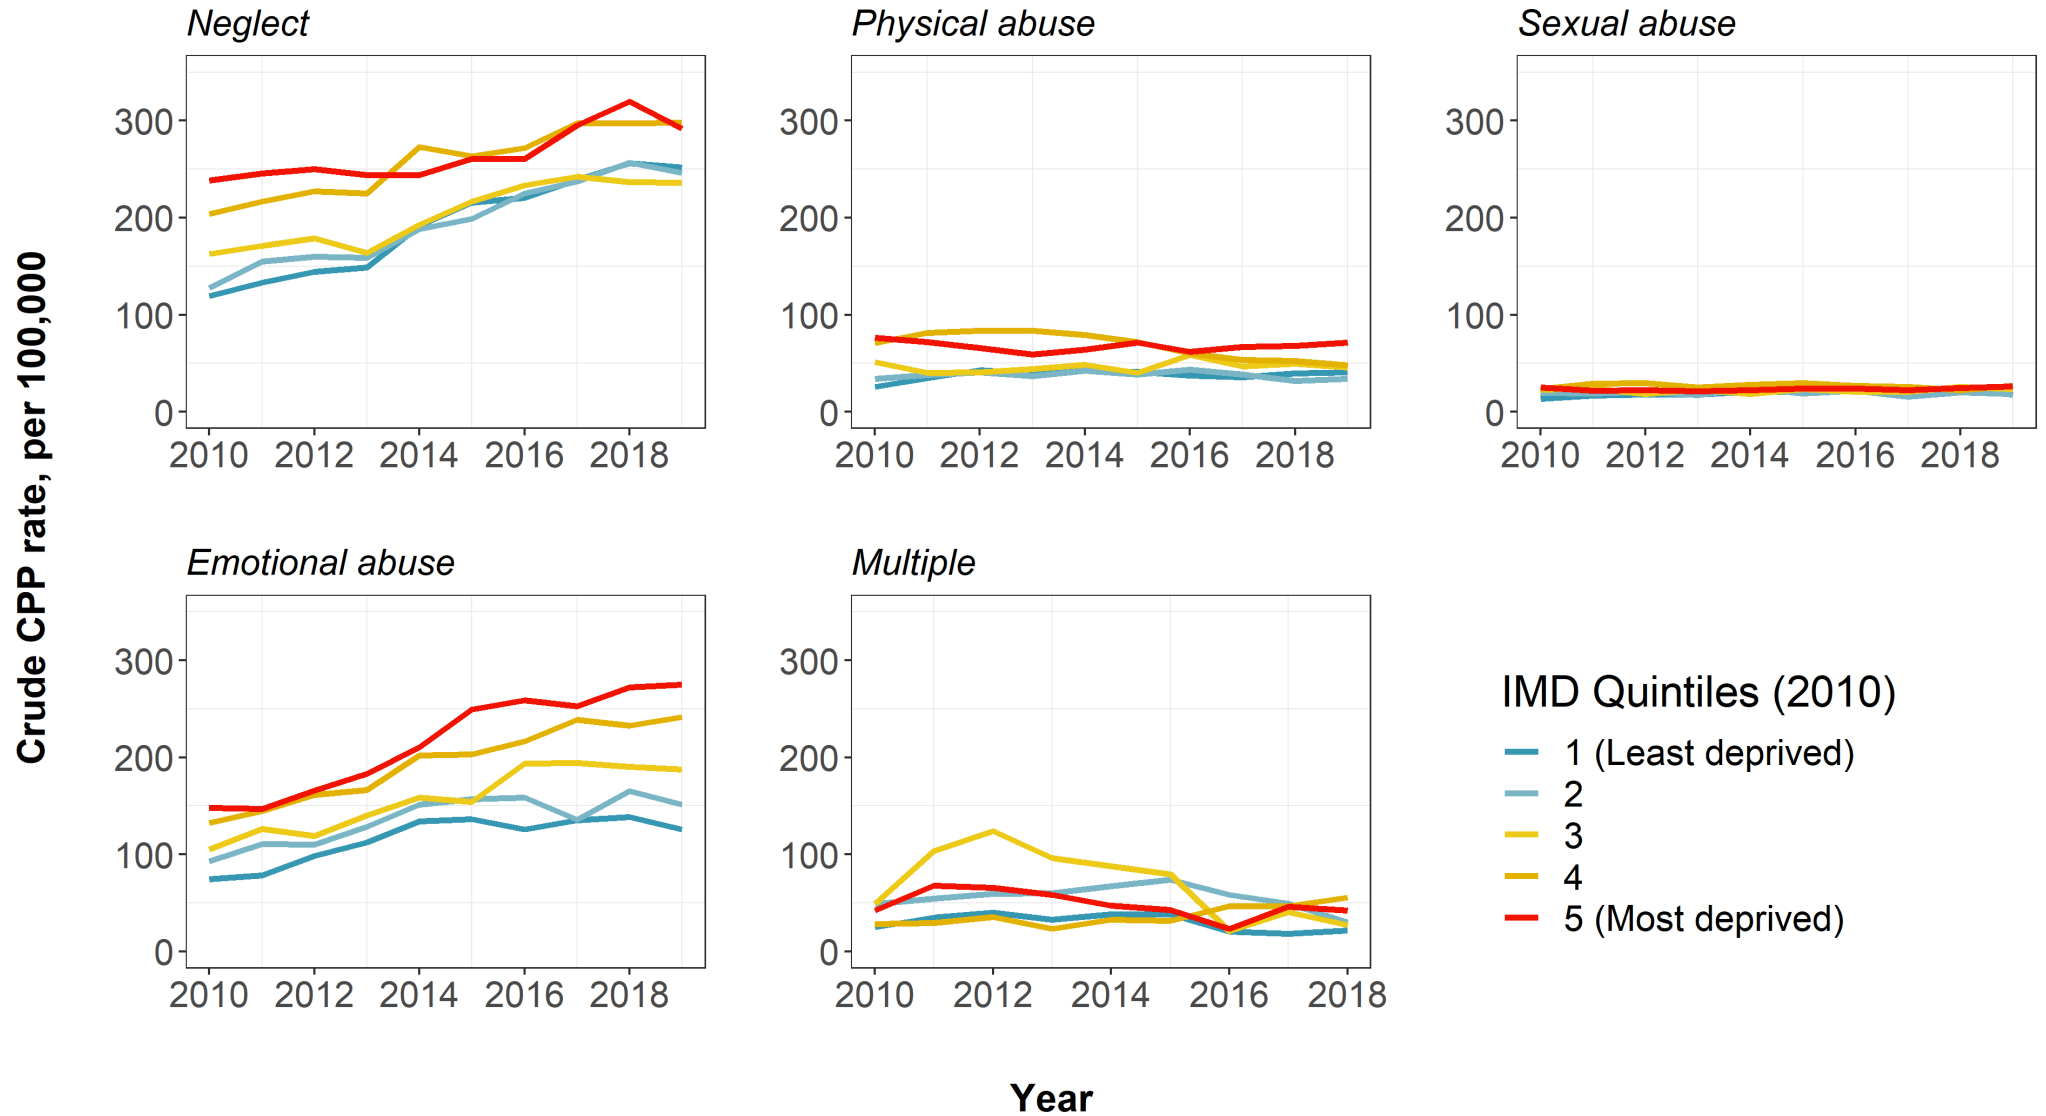

Supplement: inline-supplementary-material-6 [file inline-supplementary-material-6.pdf]
