# Supplementary material
Source: HighWire-hosted journal article supplement (https://bmjopen.bmj.com/content/10/11/e041774)

## Histogram of stdres

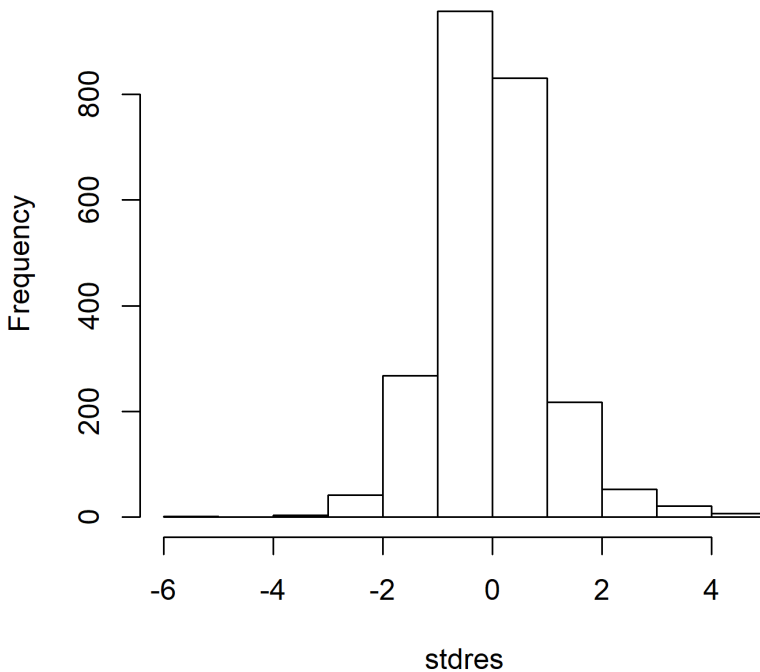

Supplement: inline-supplementary-material-7 [file inline-supplementary-material-7.pdf]
